# Supplementary material
Source: Elsevier journal article supplement (https://www.sciencedirect.com/science/article/pii/S1888989119300734)
Supplement: mmc1 [file S1888989119300734:mmc1.doc]

**DATOS SUPLEMENTARIOS**

**Tabla DS1. Características clínicas en el momento basal, según grupo diagnóstico.**

|  | TDM (n=32) | Trastorno Bipolar (n=20) | Esquizofrenia y otros trastornos psicóticos (n= 21) | *p*-Valor |
| --- | --- | --- | --- | --- |
| Género (femenino), % (n) | 62.5 (20) | 60 (12) | 42.9 (9) | 0.178a |
| Edad, media (DE), años | 70.66 (10.11) | 57.25 (15.89) | 54.05 (14.55) | 0.000b |
| Edad inicio trastorno, mediana (mín-máx), años | 50 (13-82) | 24 (14-53) | 21.50 (15-50) | 0.000c |
| Duración de la enfermedad, media (SD), años | 19 (14.52) | 23.10 (12.63) | 21.90 (17.0) | 0.595b |
| Episodios previos, mediana (mín-máx), número | 3 (1-16) | 6 (2-17) | 5 (1-20) | 0.002c |
| Síntomas psicóticos, % (n) | 68.8 (22) | 85 (17) | 100 (21) | 0.004a |
| TEC aguda previa, mediana (mín-máx), número | 2 (1-10) | 1 (1-4) | 2 (1-13) | 0.277c |
| Amplitud de pulso 1ms*, % (n) | 64.5 (20) | 100 (17) | 100 (20) | 0.000a |
| Frecuencia TEC-c/m ≥ 1m, % (n) | 78.1 (25) | 60 (12) | 71.4 (15) | 0.508a |
| Recidiva durante el seguimiento, % (n) | 43.8 (14) | 55 (11) | 52.4 (11) | 0.501a |

TDM = Trastorno Depresivo Mayor. ap valor, test 2; bp valor, ANOVA; cp valor, Kruskal-Wallis. *No se dispone de los datos en 5 pacientes.
